# Supplementary material for: Semaphorin4A promotes lung cancer by activation of NF-κB pathway mediated by PlexinB1
Source: PeerJ journal article supplement (doi:10.7717/peerj.16292), 2023-10-24

Figure 1B

The original blot of GAPDH in LC cells

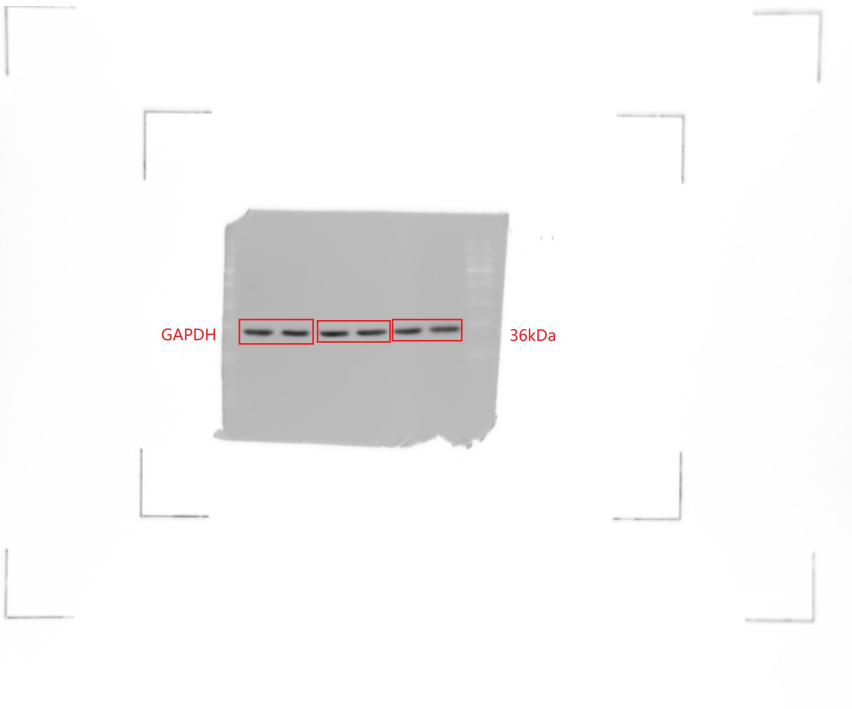

Figure 1B

The original blot of Sema4A in LC cells

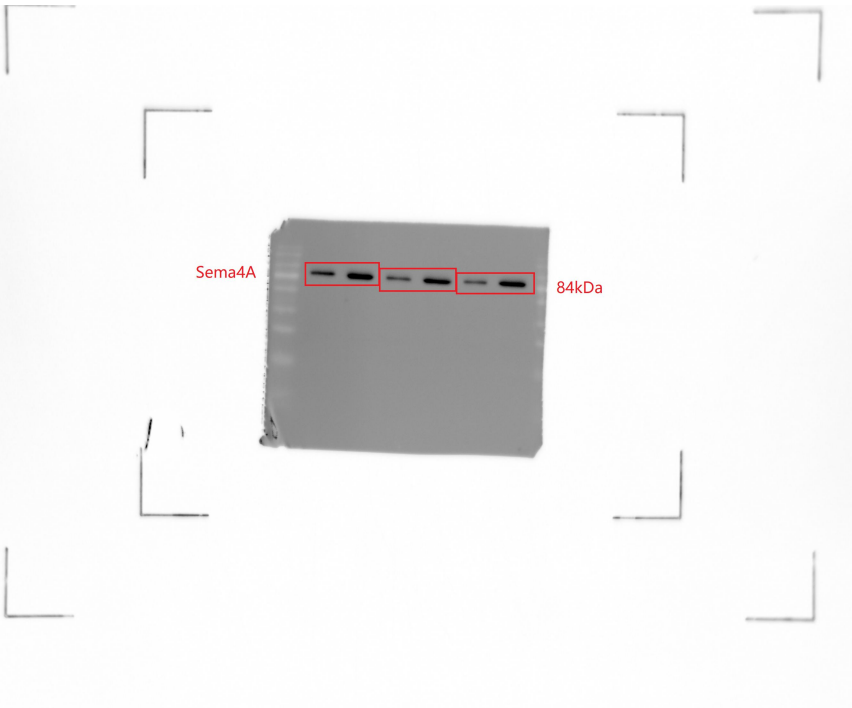

Figure 2  
The original blot of GAPDH in LC cells

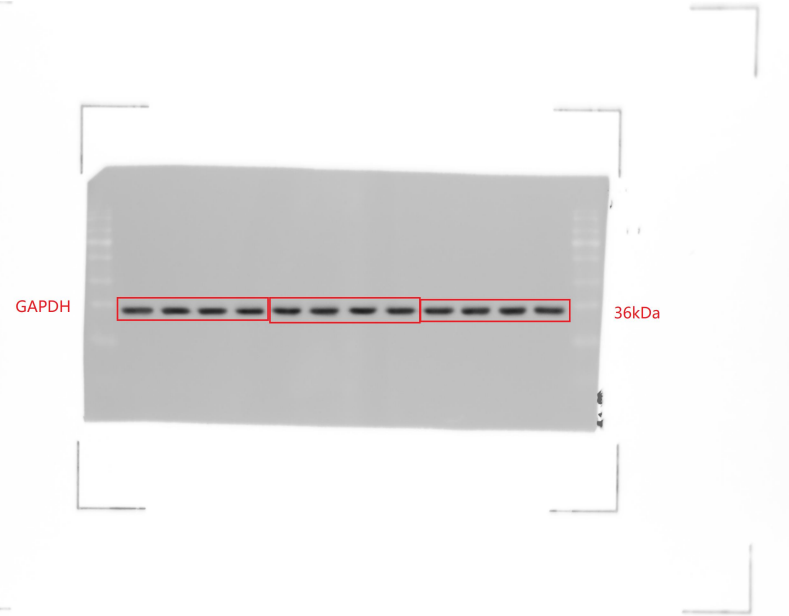

Figure 2  
The original blot of NF- $\kappa$ B in LC cells

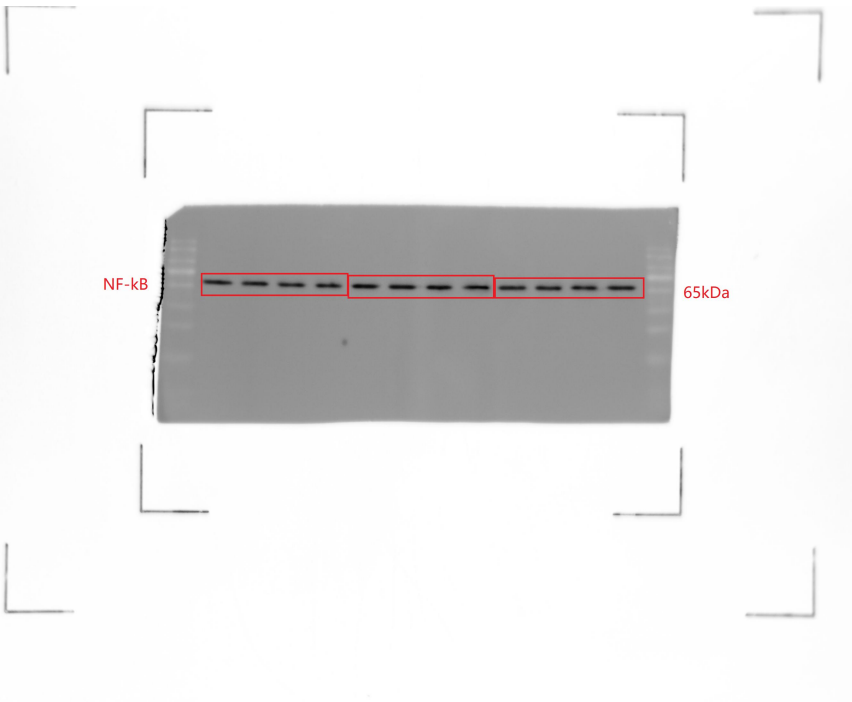

Figure 2  
The original blot of p-NF-kB in LC cells

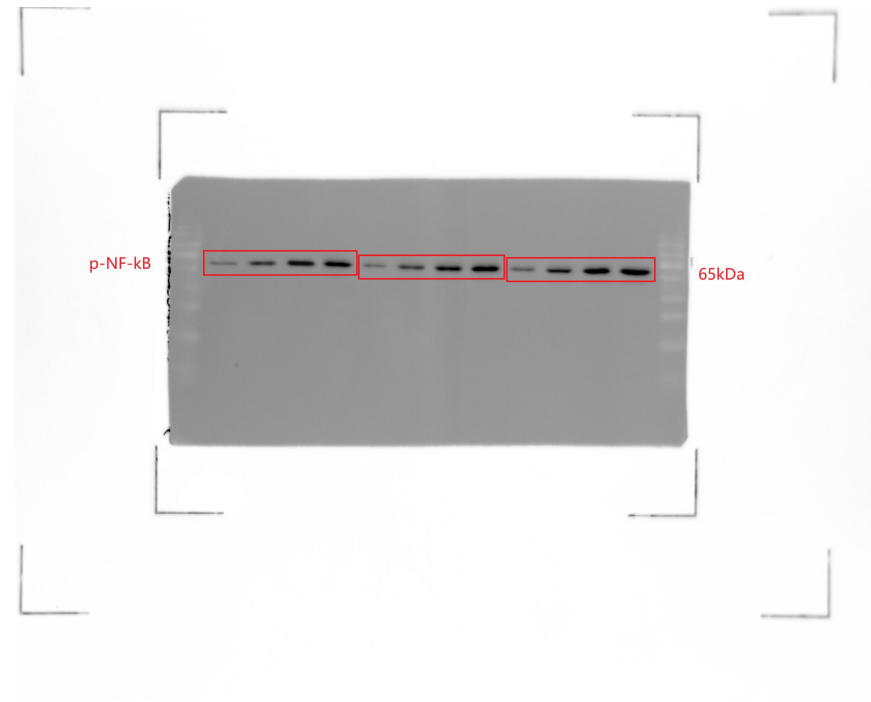

Figure 2  
The original blot of Stat3 in LC cells

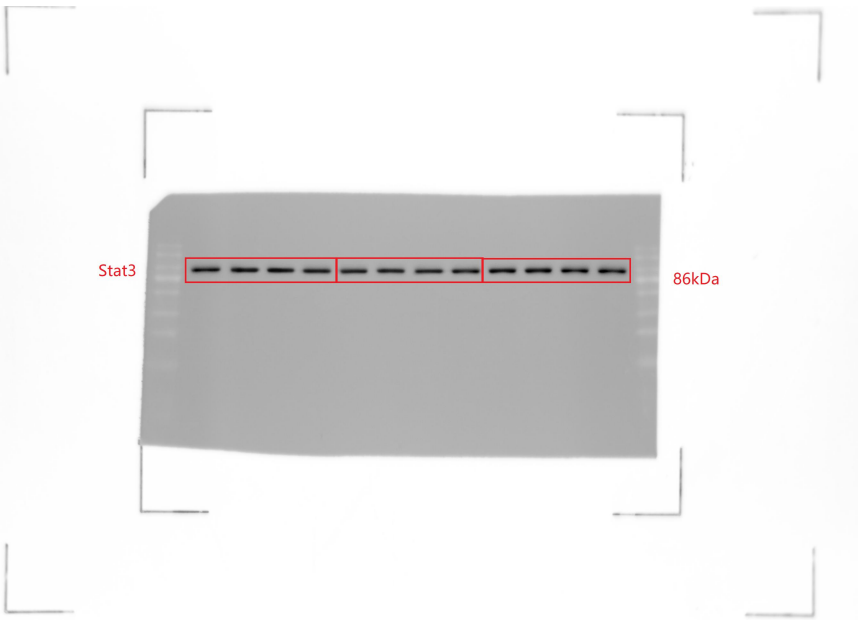

Figure 2

The original blot of p-Stat3 in LC cells

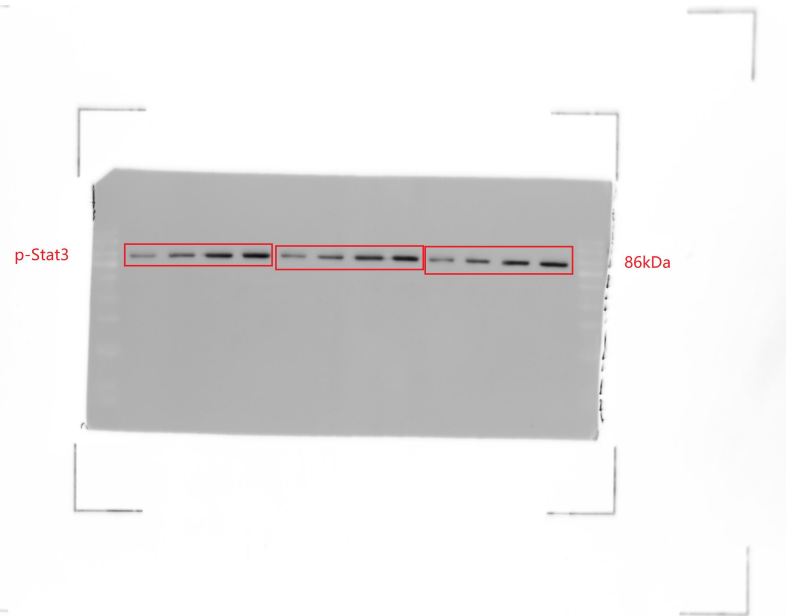

Figure 2  
The original blot of MAPK in LC cells

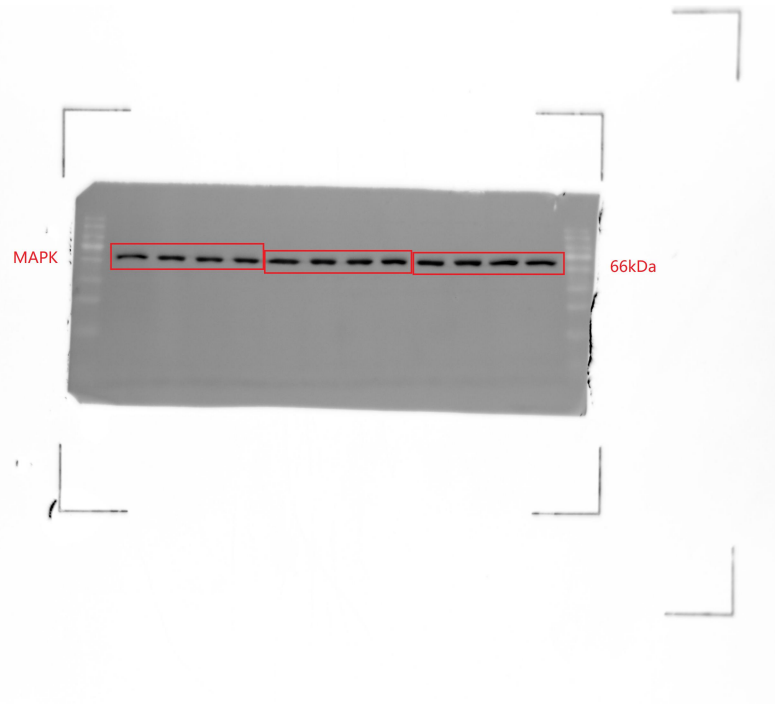



Figure 2

The original blot of p-MAPK in LC cells

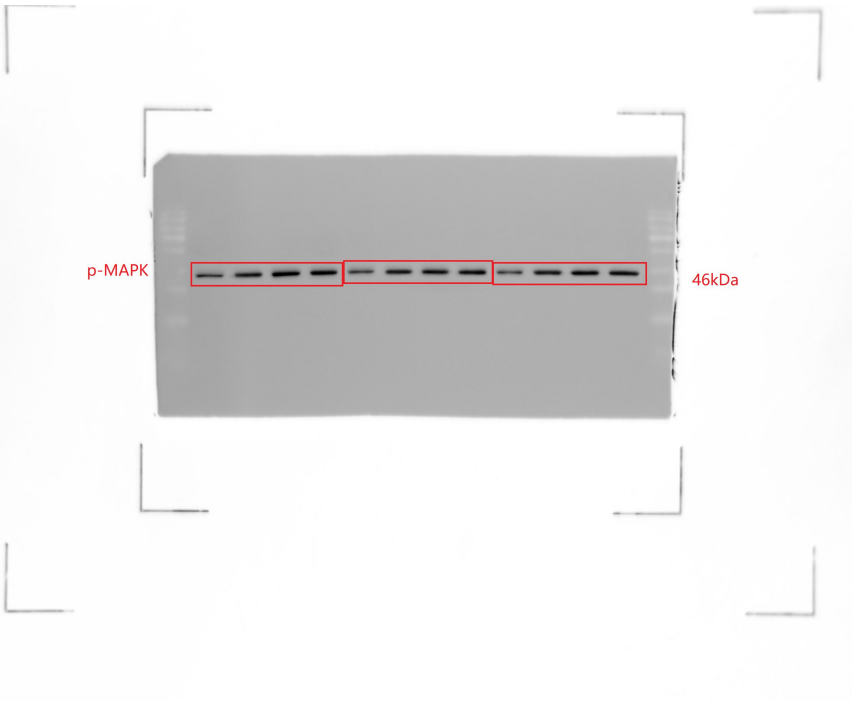

Figure 6  
The original blot of GAPDH in LC cells

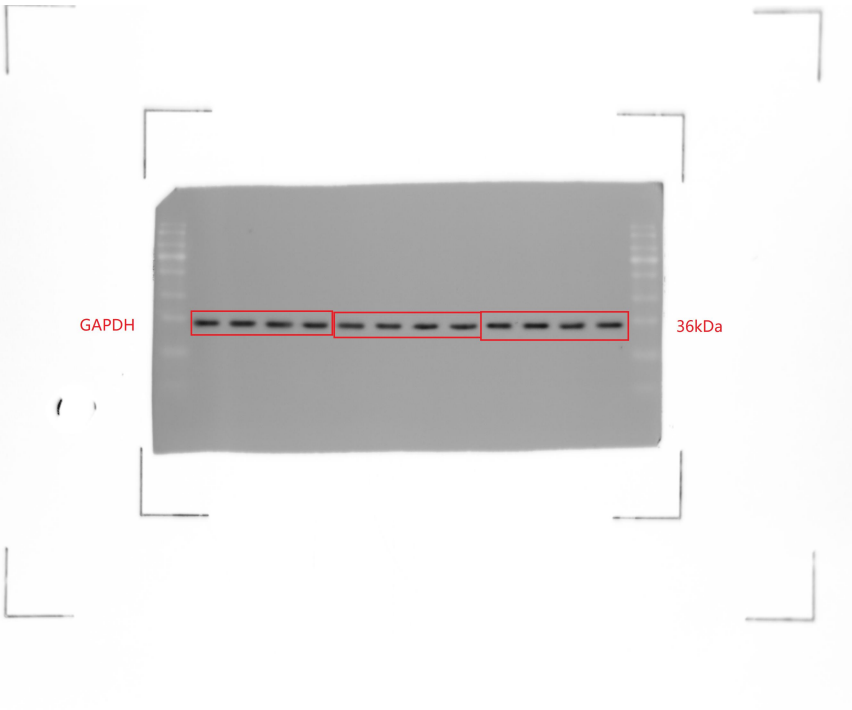

Figure 6

The original blot of NF- $\kappa$ B in LC cells

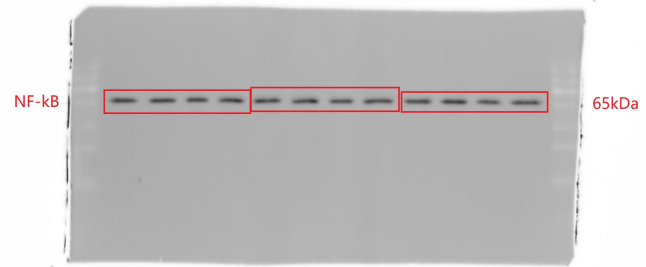

Figure 6  
The original blot of p-NF-kB in LC cells

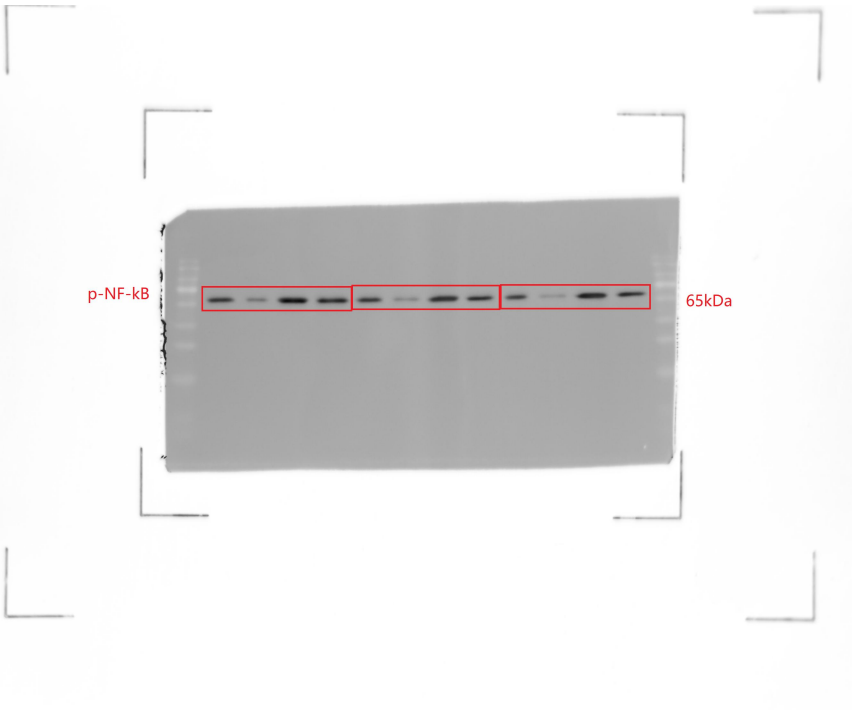

Figure 6

The original blot of Stat3 in LC cells

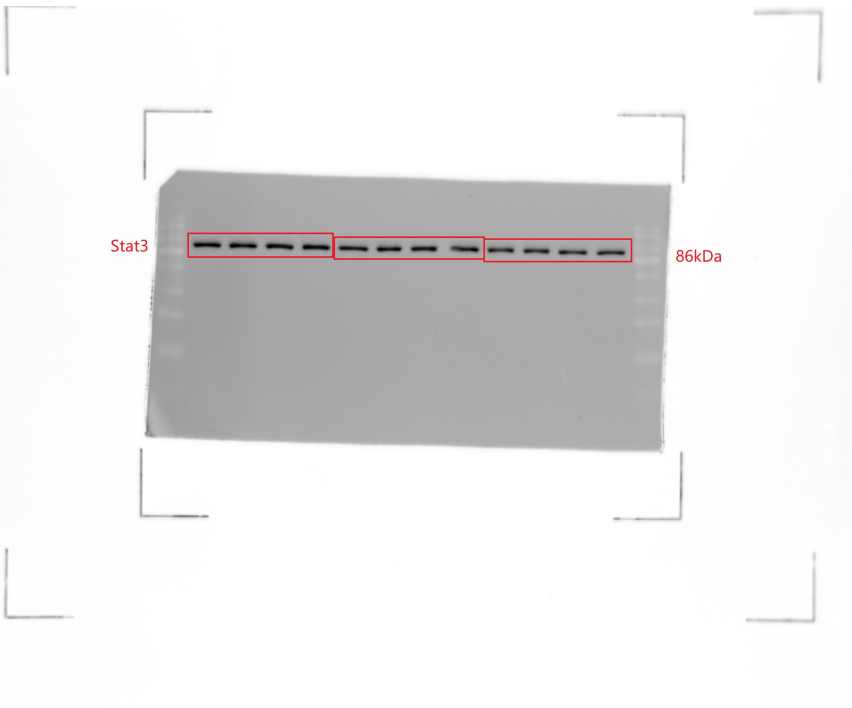

Figure 6  
The original blot of p-Stat3 in LC cells

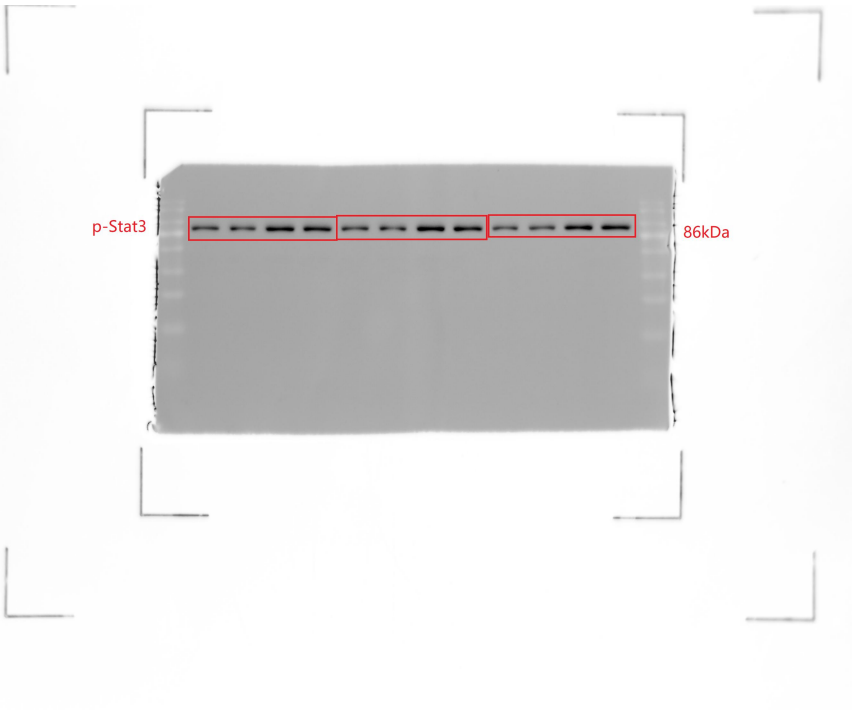

Figure 6  
The original blot of MAPK in LC cells

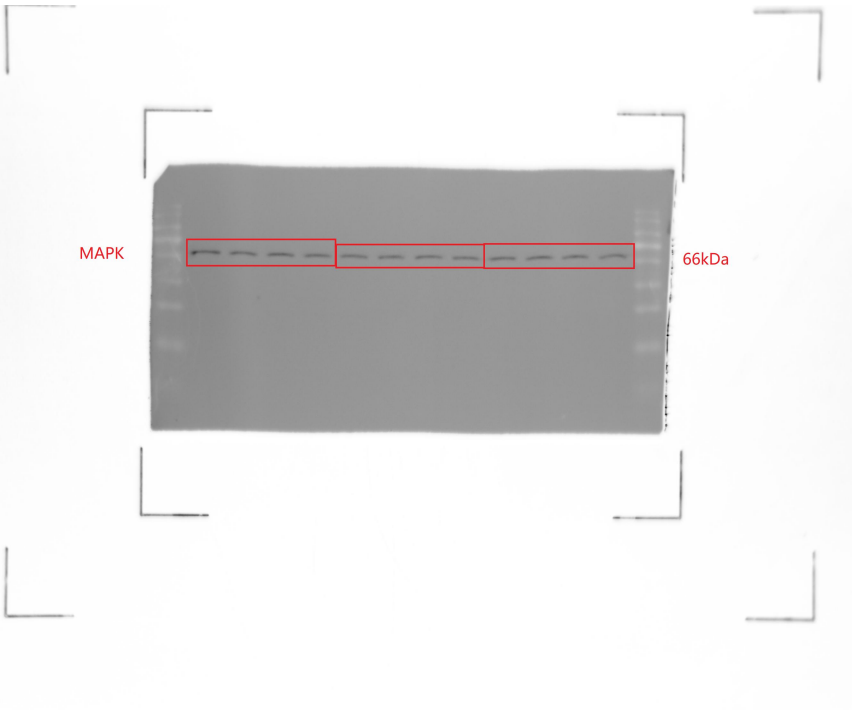

Figure 6  
The original blot of p-MAPK in LC cells

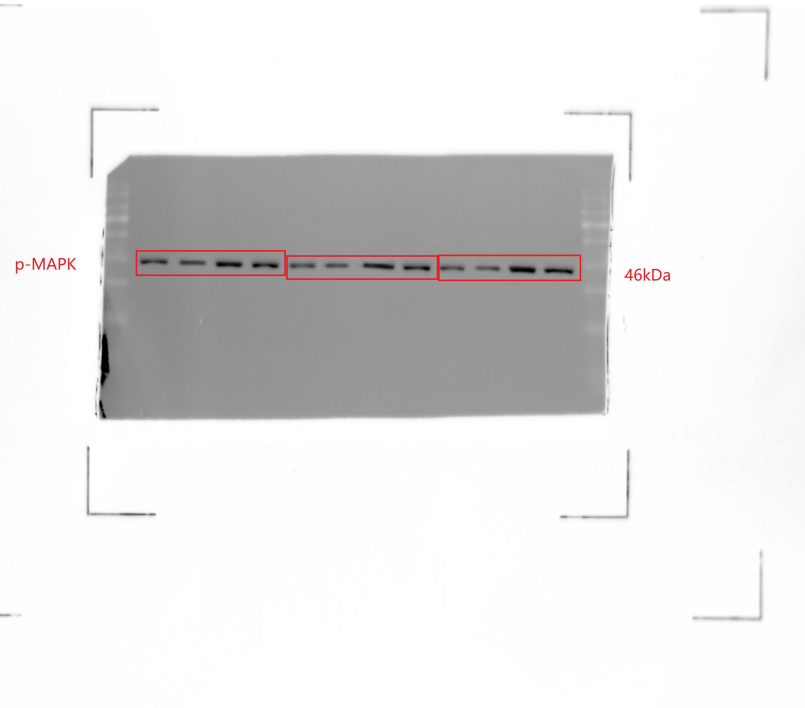

Supplement: The_original_gels_of_western_blot.pdf [file The_original_gels_of_western_blot.pdf]
