# Supplementary material for: Semaphorin4A promotes lung cancer by activation of NF-κB pathway mediated by PlexinB1
Source: PeerJ. 2023 Oct 24;11:e16292. doi: 10.7717/peerj.16292 (PMC10607275; doi:10.7717/peerj.16292)
Supplement: Supplemental Information 1 [file peerj-11-16292-s001.xlsx]

## Sheet: Figure 1A
Figure 1A
Sema4A mRNA expression was tested by qPCR
	HBE	NCI-H460
Sema4A	24.3036	21.2872
Sema4A	24.4259	21.1093
Sema4A	24.1898	22.3254
GAPDH	19.4817	19.1425
GAPDH	19.8114	18.8733
GAPDH	19.762	19.9188
AV	19.685	19.3115
ΔCt	4.82197	2.14472
	4.61454	2.23602
	4.42774	2.40664
AV	4.62142	2.26246
ΔΔCt	0.200548	-2.4767
	-0.00687427	-2.3854
	-0.193674	-2.21478
2^(-ΔΔCt)	0.87022	5.56624
	1.00478	5.22487
	1.14367	4.6421
AV	1.00622	5.1444
SD	0.136732	0.467293

## Sheet: Figure 1B
Figure 1B
Sema4A protein expression was measured by western blot
Protein	HBE	NCI-H460
Sema4A	13118.3	25871.9
Sema4A	9335.54	23150.9
Sema4A	7807.25	23838.8
GAPDH	25371	25484.2
GAPDH	26908.3	25810.7
GAPDH	25616.7	26147.7
Sema4A/GAPDH	0.517058	1.01521
Sema4A/GAPDH	0.346939	0.896949
Sema4A/GAPDH	0.304772	0.911697
AV	0.38959	0.941286
Statistical data	1.32719	2.60585
	0.890523	2.30229
	0.78229	2.34015
AV	1	2.41609
SD	0.288473	0.165417

## Sheet: Figure 2
Figure 2
Sema4A-Fc protein, the expression of p-NF-κB, t-NF-κB, p-Stat3, t-Stat3, p-MAPK and t-MAPK in LC cells were determined by western blot
Protein	0 nmol/l	10 nmol/l	50 nmol/l	100 nmol/l
NF-kB	41044.9	39431.8	39430.7	40276.3
NF-kB	47544	48413	47825.7	47070.3
NF-kB	42527.6	42952.3	43029.9	43933.4
GAPDH	50188.6	50659.6	50685.3	50240
GAPDH	53076.7	53740.6	52657.8	52225.1
GAPDH	52080.9	53054.3	51524.5	51993.3
NF-kB/GAPDH	0.817814	0.778367	0.777952	0.801678
NF-kB/GAPDH	0.89576	0.900866	0.908237	0.901296
NF-kB/GAPDH	0.816569	0.809591	0.835135	0.844981
AV	0.843381	0.829608	0.840441	0.849318
Statistical data	0.969685	0.922913	0.92242	0.950552
	1.06211	1.06816	1.0769	1.06867
	0.968209	0.959935	0.990223	1.0019
AV	1	0.983669	0.996514	1.00704
SD	0.0537906	0.075476	0.0774316	0.0592265
Protein	0 nmol/l	10 nmol/l	50 nmol/l	100 nmol/l
p-NF-kB	8511.83	22353.9	39377.6	45506.9
p-NF-kB	9186.95	23469.5	40272.8	51064.4
p-NF-kB	13771.2	30849.2	50048.7	57545.9
NF-kB	41044.9	39431.8	39430.7	40276.3
NF-kB	47544	48413	47825.7	47070.3
NF-kB	42527.6	42952.3	43029.9	43933.4
p-NF-kB/NF-kB	0.207379	0.566899	0.998653	1.12987
p-NF-kB/NF-kB	0.19323	0.484777	0.842074	1.08485
p-NF-kB/NF-kB	0.323818	0.718221	1.16312	1.30984
AV	0.241476	0.589966	1.00128	1.17485
Statistical data	0.858797	2.34765	4.13563	4.67901
	0.800207	2.00756	3.4872	4.4926
	1.341	2.9743	4.8167	5.42433
AV	1	2.44317	4.14651	4.86531
SD	0.296761	0.490397	0.664816	0.493015
Protein	0 nmol/l	10 nmol/l	50 nmol/l	100 nmol/l
Stat3	48236	47872.9	46235.2	46854.9
Stat3	43689.4	42938.6	43873.3	44595.9
Stat3	50136	51102.1	50092.3	50988.2
GAPDH	50188.6	50659.6	50685.3	50240
GAPDH	53076.7	53740.6	52657.8	52225.1
GAPDH	52080.9	53054.3	51524.5	51993.3
Stat3/GAPDH	0.961096	0.944991	0.912202	0.93262
Stat3/GAPDH	0.823136	0.798998	0.833177	0.853916
Stat3/GAPDH	0.962658	0.963203	0.972204	0.980668
AV	0.91563	0.902397	0.905861	0.922402
Statistical data	1.04966	1.03207	0.996256	1.01856
	0.898983	0.872621	0.90995	0.9326
	1.05136	1.05196	1.06179	1.07103
AV	1	0.985548	0.989331	1.0074
SD	0.0874871	0.0983018	0.0761552	0.0698873
Protein	0 nmol/l	10 nmol/l	50 nmol/l	100 nmol/l
p-Stat3	14494.9	28641	46683.3	54954
p-Stat3	17570.6	31489.7	46713.1	50554.8
p-Stat3	18634.9	32312	41343.4	51271.4
Stat3	48236	47872.9	46235.2	46854.9
Stat3	43689.4	42938.6	43873.3	44595.9
Stat3	50136	51102.1	50092.3	50988.2
p-Stat3/Stat3	0.300499	0.598273	1.00969	1.17286
p-Stat3/Stat3	0.402171	0.733366	1.06473	1.13362
p-Stat3/Stat3	0.371686	0.632302	0.825343	1.00556
AV	0.358119	0.654647	0.966588	1.10401
Statistical data	0.839103	1.6706	2.81943	3.27505
	1.12301	2.04783	2.97312	3.16549
	1.03789	1.76562	2.30467	2.80788
AV	1	1.82802	2.69907	3.08281
SD	0.145696	0.196203	0.350104	0.244311
Protein	0 nmol/l	10 nmol/l	50 nmol/l	100 nmol/l
MAPK	39273.8	38977.3	39104.3	38633.2
MAPK	45775.9	43041.8	43155.8	44117.8
MAPK	47012.4	48255.6	50443.9	49268
GAPDH	50188.6	50659.6	50685.3	50240
GAPDH	53076.7	53740.6	52657.8	52225.1
GAPDH	52080.9	53054.3	51524.5	51993.3
Stat3/GAPDH	0.782525	0.769396	0.771511	0.768972
Stat3/GAPDH	0.862447	0.800918	0.819552	0.844761
Stat3/GAPDH	0.902682	0.909551	0.979028	0.947584
AV	0.849218	0.826622	0.856697	0.853773
Statistical data	0.921465	0.906006	0.908496	0.905507
	1.01558	0.943124	0.965067	0.994752
	1.06296	1.07105	1.15286	1.11583
AV	1	0.973392	1.00881	1.00536
SD	0.0720204	0.0865831	0.127919	0.105563
Protein	0 nmol/l	10 nmol/l	50 nmol/l	100 nmol/l
p-MAPK	30384.1	45637	56768.7	50119
p-MAPK	28892.9	46786.6	44034.3	48026.7
p-MAPK	26798.2	47242.9	54376.1	49449.6
MAPK	39273.8	38977.3	39104.3	38633.2
MAPK	45775.9	43041.8	43155.8	44117.8
MAPK	47012.4	48255.6	50443.9	49268
p-MAPK/MAPK	0.773649	1.17086	1.45173	1.2973
p-MAPK/MAPK	0.631182	1.087	1.02036	1.0886
p-MAPK/MAPK	0.570025	0.979013	1.07795	1.00368
AV	0.658285	1.07896	1.18335	1.12986
Statistical data	1.17525	1.77865	2.20532	1.97073
	0.958827	1.65127	1.55002	1.65369
	0.865923	1.48722	1.63752	1.5247
AV	1	1.63905	1.79762	1.71637
SD	0.15872	0.146102	0.355777	0.229529

## Sheet: Figure 3A
Figure 3A
After transfected with si-NC or si-Sema4A, the proliferative ability of LC cells treated with or without Sema4A-Fc protein were detected by colony formation assay
colony number
	si-NC	si-Sema4A	si-Sema4A + Sema4A-Fc
1	51	18	55
2	64	14	59
3	57	21	48
AV	57.3333	17.6667	54
SD	6.50641	3.51188	5.56776

## Sheet: Figure 3B
Figure 3B
After transfected with si-NC or si-Sema4A, the migratory ability of LC cells treated with or without Sema4A-Fc protein were detected by scratch assay
	0 h	24 h	Relative migration distance (%)
si-NC	481.449	183.73	61.838			Relative migration distance % (24 h)
si-NC	478.589	218.774	54.2877				si-NC	si-Sema4A	si-Sema4A + Sema4A-Fc
si-NC	475.729	142.247	70.0992			1	61.838	18.6283	49.6742
si-Sema4A	472.869	384.782	18.6283			2	54.2877	3.18676	61.4154
si-Sema4A	470.009	455.031	3.18676			3	70.0992	11.3661	57.7294
si-Sema4A	463.615	410.92	11.3661			AV	62.075	11.0604	56.273
si-Sema4A + Sema4A-Fc	475.729	239.415	49.6742			SD	7.90842	7.72529	6.00459
si-Sema4A + Sema4A-Fc	511.932	197.527	61.4154
si-Sema4A + Sema4A-Fc	478.101	202.096	57.7294

## Sheet: Figure 3C
Figure 3C
After transfected with si-NC or si-Sema4A, the invasive ability of LC cells treated with or without Sema4A-Fc protein were detected by Transwell assay
Invasive number
	si-NC	si-Sema4A	si-Sema4A + Sema4A-Fc
1	86	27	76
2	81	24	86
3	97	21	70
AV	88	24	77.3333
SD	8.18535	3	8.0829

## Sheet: Figure 3D
Figure 3D
After transfected with si-NC or si-Sema4A, the viability of LC cells treated with or without Sema4A-Fc protein were detected by MTT assay
OD value	si-NC	si-Sema4A	si-Sema4A + Sema4A-Fc	Blank
1	0.9859	0.7475	0.8555	0.0512
2	1.1597	0.7243	0.9757	0.0503
3	1.0834	0.5982	0.8394	0.0556
4	1.1572	0.6179	0.895	0.0513
5	1.0813	0.7089	0.7816	0.0509
6	0.9484	0.6889	0.9459	0.0533
AV	1.06932	0.68095	0.882183	0.0521
SD	0.0869641	0.059959	0.0715945	0.00199098
Cell viability	si-NC	si-Sema4A	si-Sema4A + Sema4A-Fc
1	91.7995	68.363	78.9802
2	108.885	66.0823	90.7968
3	101.384	53.6857	77.3975
4	108.64	55.6224	82.8634
5	101.178	64.5683	71.7153
6	88.113	62.6022	87.8672
AV	100	61.8207	81.6034
SD	8.54922	5.89442	7.03828

## Sheet: Figure 4A
Figure 4A
After stimulation by Sema4A-Fc protein, PlexinB1, PlexinB2, PlexinD1 blocking antibodies, and IgG antibody alone or in combination, the proliferative ability of LC cells were assessed by colony formation assay
Colony number
	Control	IgG	a PlxinB1	a PlxinB2	a PlxinD1	Sema4A-Fc	Sema4A-Fc+IgG	Sema4A-Fc+a PlxinB1	Sema4A-Fc+a PlxinB2	Sema4A-Fc+a PlxinD1
1	69	62	16	40	32	82	86	48	72	62
2	61	71	18	33	30	89	73	56	64	64
3	56	57	21	41	26	71	91	60	79	76
AV	62	63.3333	18.3333	38	29.3333	80.6667	83.3333	54.6667	71.6667	67.3333
SD	6.55744	7.0946	2.51661	4.3589	3.05505	9.07377	9.29157	6.1101	7.50555	7.57188

## Sheet: Figure 4B
Figure 4B
After stimulation by Sema4A-Fc protein, PlexinB1, PlexinB2, PlexinD1 blocking antibodies, and IgG antibody alone or in combination, the migratory ability of LC cells were assessed by scratch assay
	0 h	24 h	Relative migration distance				Relative migration distance %（12h）
Control	458.057	208.156	54.5567					Control	IgG	a PlxinB1	a PlxinB2	a PlxinD1	Sema4A-Fc	Sema4A-Fc+IgG	Sema4A-Fc+a PlxinB1	Sema4A-Fc+a PlxinB2	Sema4A-Fc+a PlxinD1
Control	444.141	226.139	49.0841				1	54.5567	52.3788	27.6813	26.9925	29.2444	71.6488	70.7022	32.1589	65.8484	40.1519
Control	469.742	191.124	59.3129				2	49.0841	49.7393	21.2196	31.106	27.6868	81.6439	66.9528	36.6668	54.9013	46.0432
IgG	459.139	218.648	52.3788				3	59.3129	44.8026	25.6553	25.1872	21.7805	76.2957	75.6705	39.5084	63.194	37.574
IgG	449.939	226.143	49.7393				AV	54.3179	48.9735	24.852	27.7619	26.2372	76.5295	71.1085	36.1114	61.3146	41.2564
IgG	451.139	249.017	44.8026				SD	5.11861	3.8457	3.30488	3.0335	3.9374	5.00163	4.37303	3.7061	5.71041	4.34126
a PlxinB1	468.246	338.63	27.6813
a PlxinB1	451.237	355.486	21.2196
a PlxinB1	489.879	364.199	25.6553
a PlxinB2	507.686	370.648	26.9925
a PlxinB2	512.951	353.392	31.106
a PlxinB2	503.715	376.843	25.1872
a PlxinD1	499.018	353.083	29.2444
a PlxinD1	478.298	345.872	27.6868
a PlxinD1	484.066	378.634	21.7805
Sema4A-Fc	456.601	129.452	71.6488
Sema4A-Fc	506.334	92.9434	81.6439
Sema4A-Fc	483.408	114.589	76.2957
Sema4A-Fc+IgG	471.436	138.12	70.7022
Sema4A-Fc+IgG	451.221	149.116	66.9528
Sema4A-Fc+IgG	496.78	120.864	75.6705
Sema4A-Fc+a PlxinB1	448.114	304.005	32.1589
Sema4A-Fc+a PlxinB1	478.517	303.06	36.6668
Sema4A-Fc+a PlxinB1	489.49	296.1	39.5084
Sema4A-Fc+a PlxinB2	512.434	175.005	65.8484
Sema4A-Fc+a PlxinB2	486.378	219.35	54.9013
Sema4A-Fc+a PlxinB2	496.688	182.811	63.194
Sema4A-Fc+a PlxinD1	476.029	284.894	40.1519
Sema4A-Fc+a PlxinD1	496.299	267.787	46.0432
Sema4A-Fc+a PlxinD1	465.796	290.778	37.574

## Sheet: Figure 5A
Figure 5A
After stimulation by Sema4A-Fc protein, PlexinB1, PlexinB2, PlexinD1 blocking antibodies, and IgG antibody, alone or in combination, the invasive ability of LC cells were assessed by Transwell assay
Invasive number
	Control	IgG	a PlxinB1	a PlxinB2	a PlxinD1	Sema4A-Fc	Sema4A-Fc+IgG	Sema4A-Fc+a PlxinB1	Sema4A-Fc+a PlxinB2	Sema4A-Fc+a PlxinD1
1	61	78	25	45	35	94	72	42	74	66
2	74	63	32	36	44	81	78	49	66	69
3	72	69	28	47	42	77	89	51	82	80
AV	69	70	28.3333	42.6667	40.3333	84	79.6667	47.3333	74	71.6667
SD	7	7.54983	3.51188	5.85947	4.72582	8.88819	8.62168	4.72582	8	7.37111

[truncated: 3 more sheets: Figure 5B, Figure 6, Figure 7]
